# Supplementary material
Source: PubMed Central journal article supplement (PMC6158678)
Supplement: la8b02401_si_001.pdf [file la8b02401_si_001.pdf]

# Supporting Information

## Selective functionalization with PNA of silicon nanowires on silicon oxide substrates

Janneke Veerbeek,<sup>a</sup> Raymond Steen,<sup>b</sup> Wouter Vijselaar,<sup>a</sup> W. Frederik Rurup,<sup>b</sup> Saša Korom,<sup>c</sup>  
Andrea Rozzi,<sup>c</sup> Roberto Corradini,<sup>c</sup> Loes Segerink,<sup>b</sup> Jurriaan Huskens\*<sup>a</sup>

<sup>a</sup>Molecular NanoFabrication group, MESA+ Institute for Nanotechnology, University of Twente, P.O. Box 217, 7500 AE Enschede, The Netherlands

<sup>b</sup>BIOS Lab on a Chip group, MESA+ Institute for Nanotechnology, TechMed Centre and Max Planck Center for Complex Fluid Dynamics, University of Twente, P.O. Box 217, 7500 AE Enschede, The Netherlands

<sup>c</sup>Department of Chemistry, Life Sciences and Environmental Sustainability, University of Parma, Parco Area delle Scienze 17/A, 43124 Parma, Italy

\*E-mail: j.huskens@utwente.nl

**Scheme S1.** Reaction scheme of the click chemistry routes tested on silicon nanowires functionalized with a 1,8-nonadiyne monolayer.

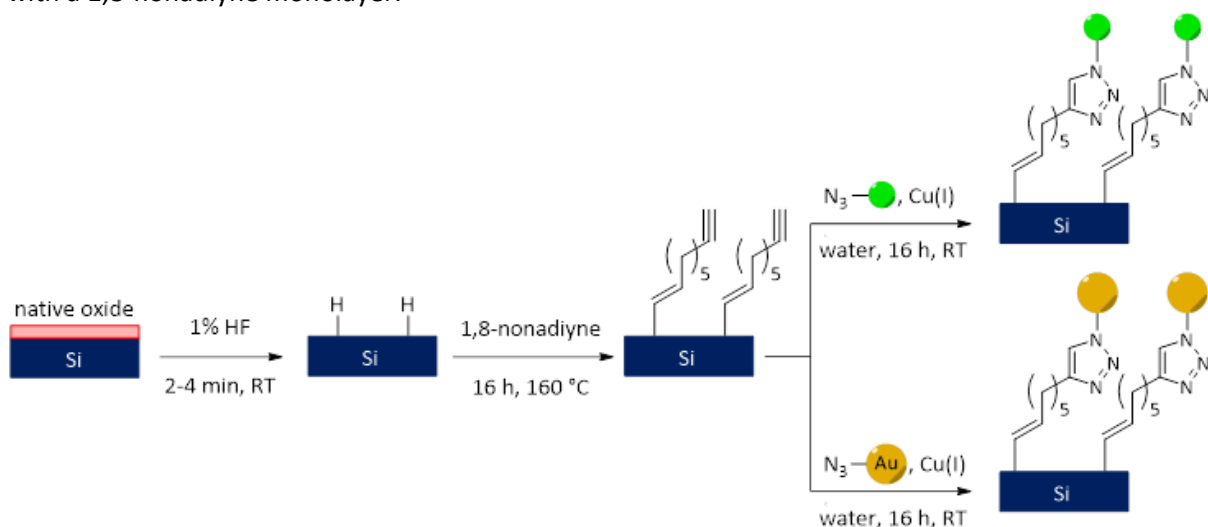

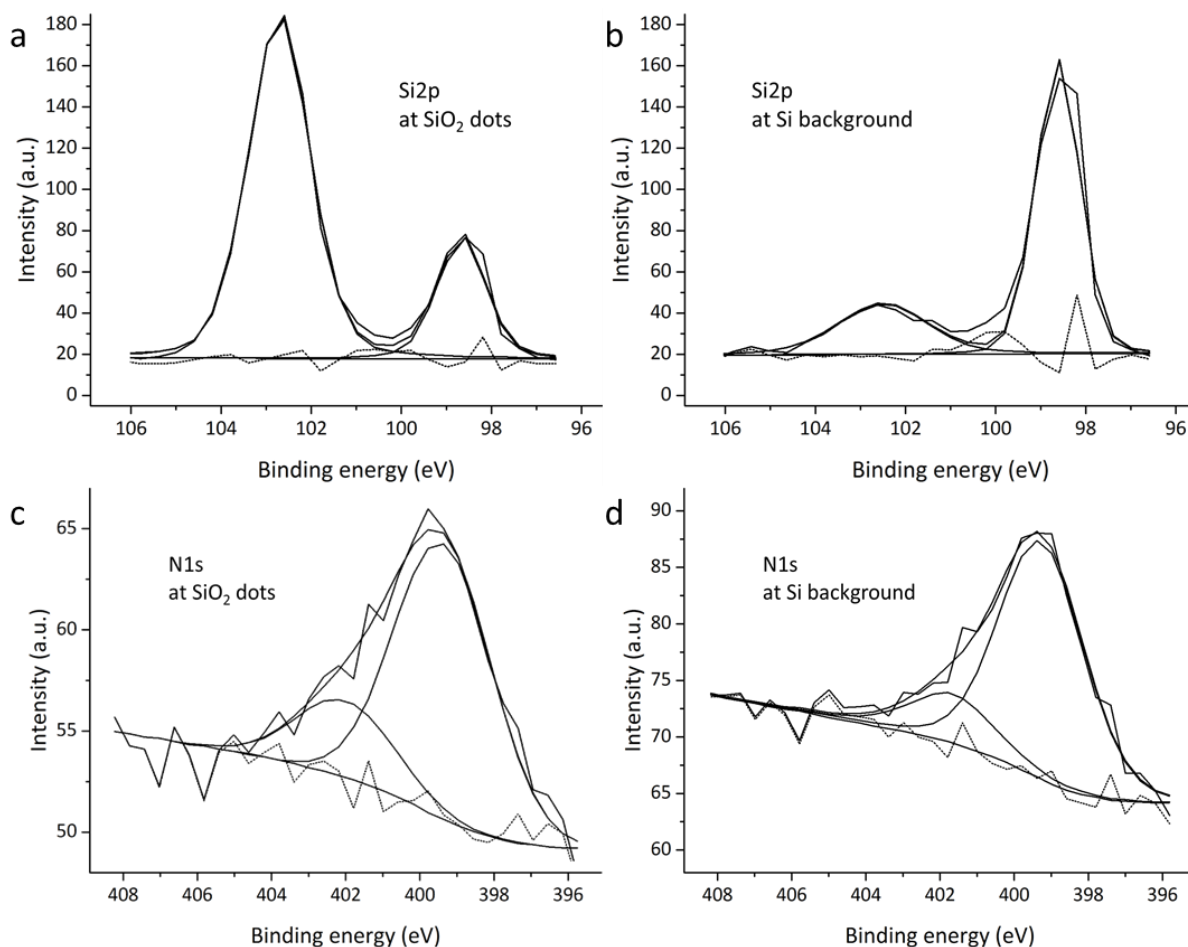

**Figure S1.** XPS spectra of the SiO<sub>2</sub>/Si patterned substrates of Figure 1c, including a) the Si2p region at the SiO<sub>2</sub> dots, b) the Si2p region at the surrounding Si, c) the N1s region at the SiO<sub>2</sub> dots, and d) the N1s region at the surrounding Si.

**Scheme S2.** Reaction schemes of a) click chemistry with azido-PNA and b) thiol-yne chemistry with thiol-PNA onto a 1,8-nonadiyne monolayer, followed by hybridization with complementary DNA.

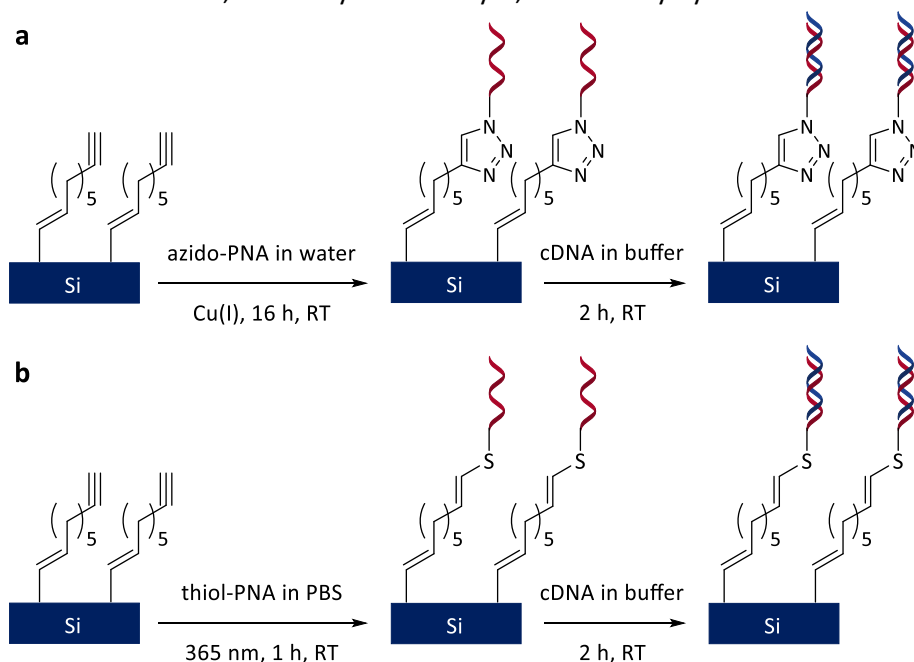

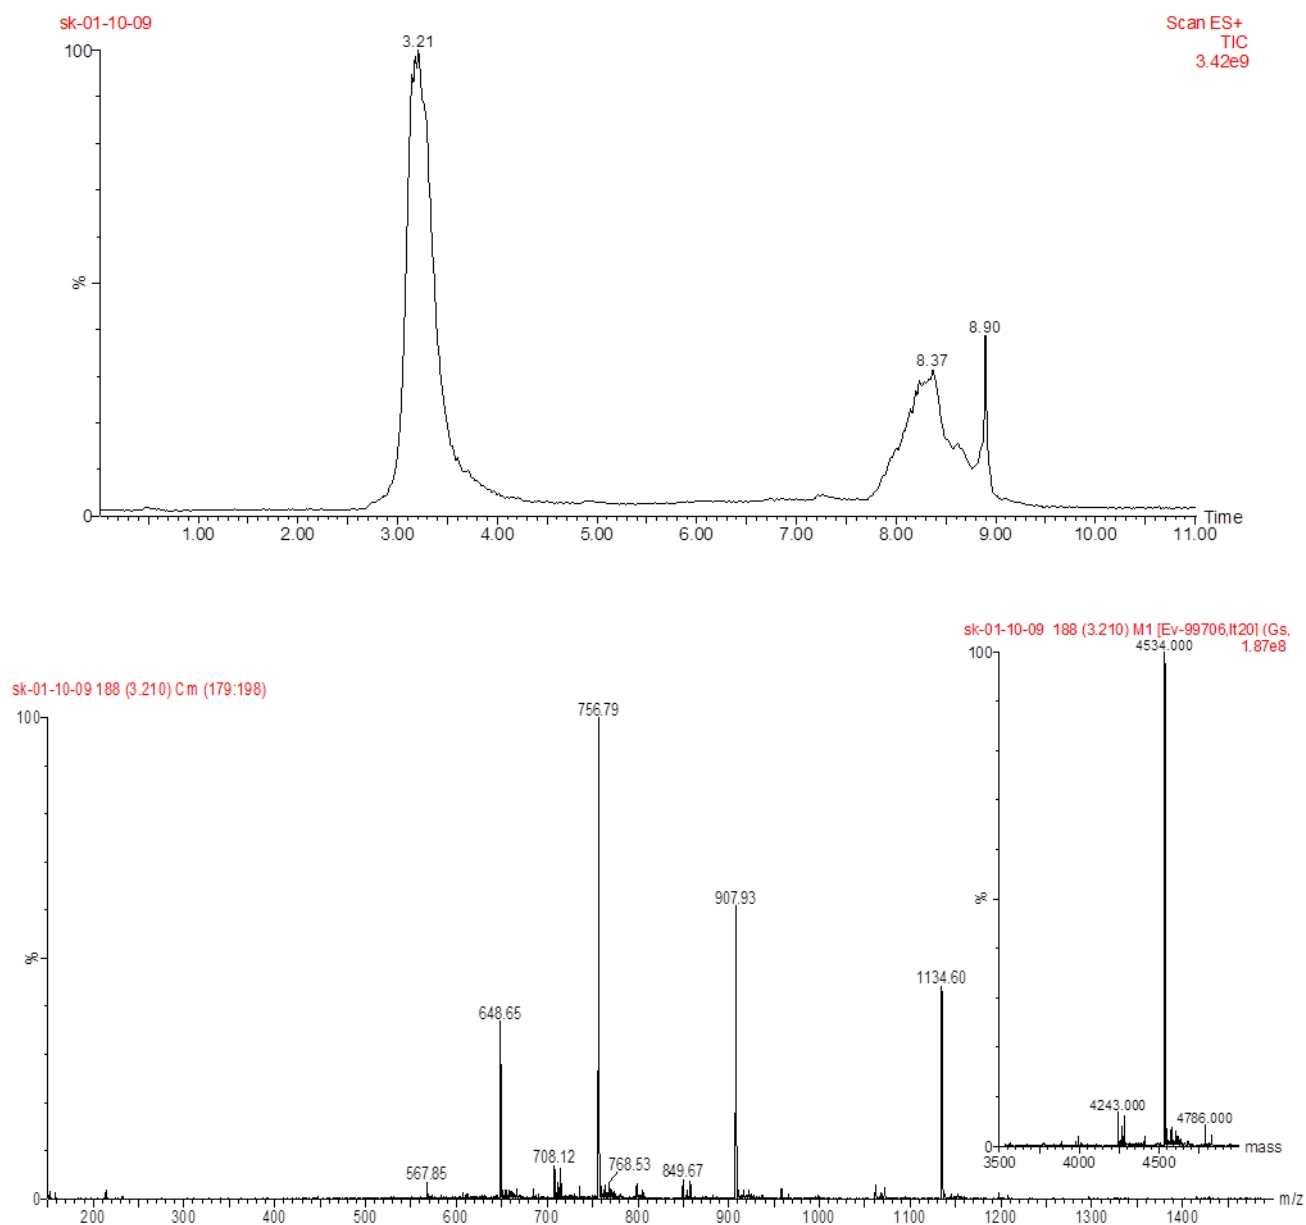

**Figure S2.** UPLC-MS analysis of azido-PNA<sub>1</sub>. UPLC-MS trace (top), MS spectrum of the corresponding peak at 3.21 min (bottom); insert: deconvolution of the multicharged signals to give average MW.

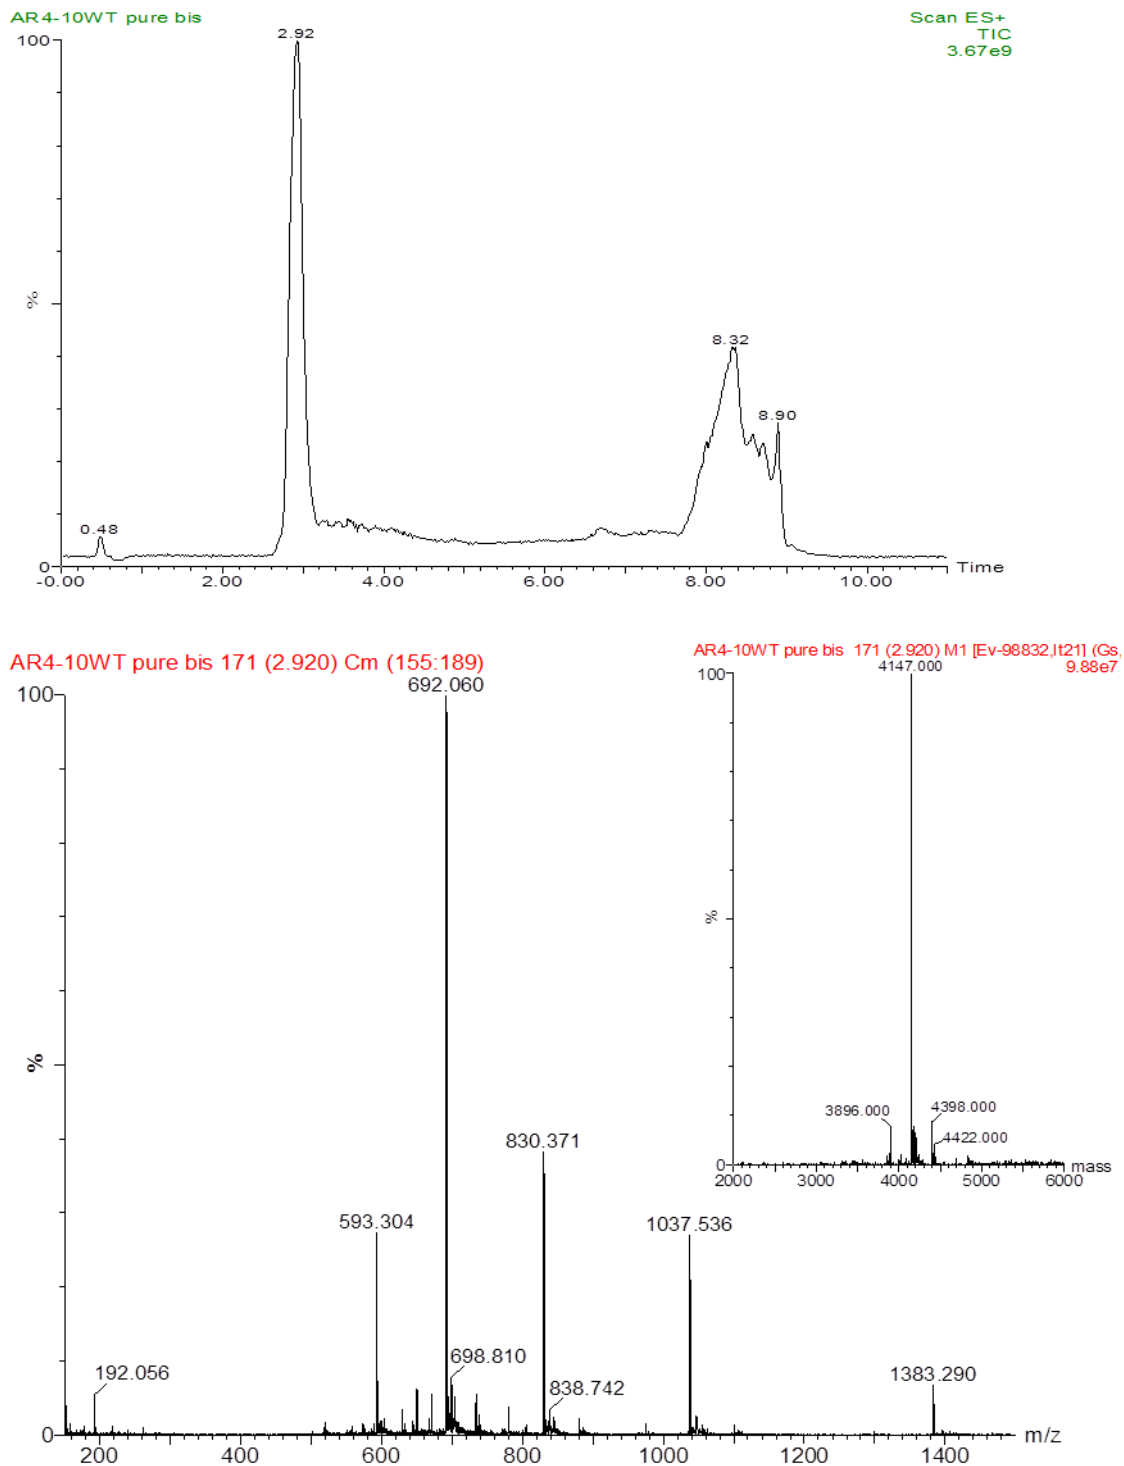

**Figure S3.** UPLC-MS analysis of azido-PNA<sub>2</sub>. UPLC-MS trace (top), MS spectrum of the corresponding peak at 2.92 min (bottom); insert: deconvolution of the multicharged signals to give average MW.

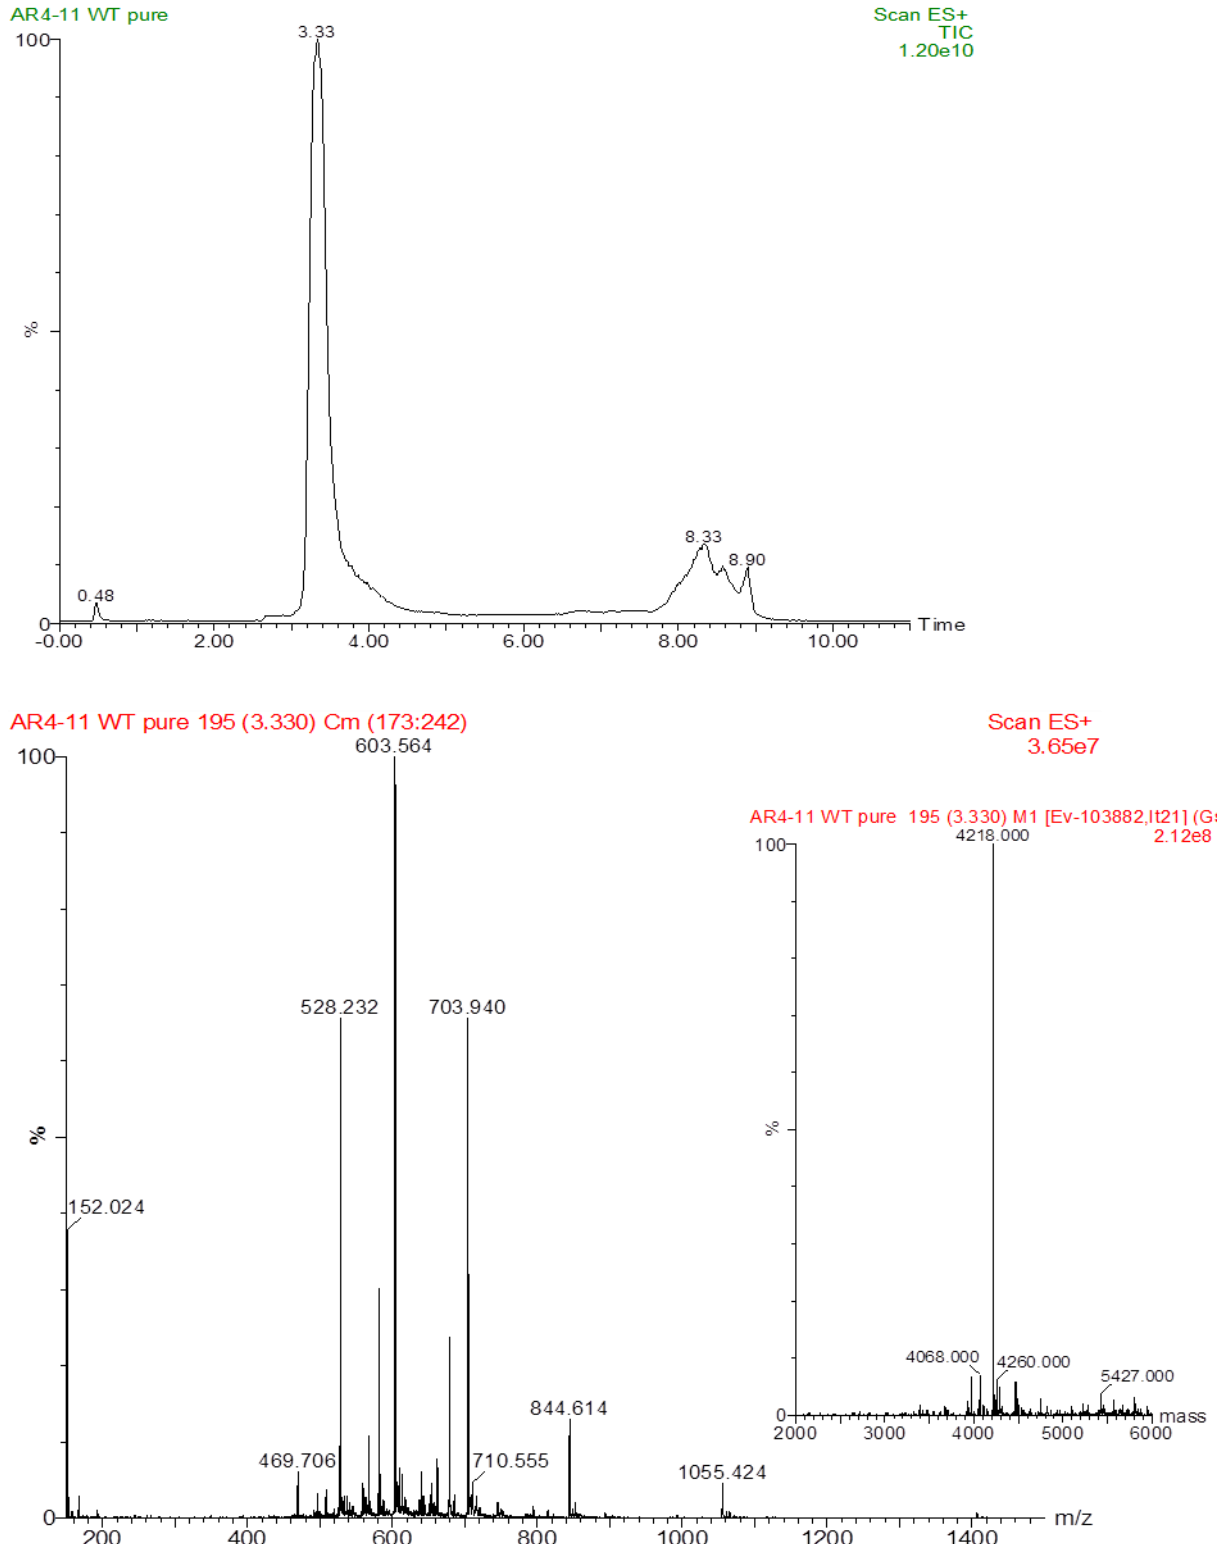

**Figure S4.** UPLC-MS analysis of (protected) thiol-PNA. UPLC-MS trace (top), MS spectrum of the corresponding peak at 3.33 min (bottom); insert: deconvolution of the multicharged signals to give average MW.
